# Supplementary material
Source: PubMed Central journal article supplement (PMC2644118)
Supplement: 0806753106_0806753106SI.pdf [file 0806753106_0806753106SI.pdf]

# Supporting Information

Le Pape *et al.* 10.1073/pnas.0806753106

## SI Text

### Experimental Procedures

**Microarray Hybridization and Data Analysis.** A genome-wide set (>38K) of long mouse oligonucleotides obtained from Illumina and printed at the Advanced Technology Center (National Cancer Institute) was used in this study. This set is based on well-annotated sequence information derived largely from the Mouse Exonic Evidence-Based Oligonucleotide consortium (MEEBO) (<http://mmc.ucsf.edu/Meebo.html>). The detailed procedure for target preparation and hybridization on microarrays is available at <http://nciarray.nci.nih.gov/reference/NCIReference.shtml>. Briefly, 10  $\mu\text{g}$  of total RNA,  $\alpha\text{MSH}$ - or ASP-treated, or from vehicle-treated melanocytes were retro-transcribed and labeled with Cy3 or Cy5 (Amersham Pharmacia Biotech) in an indirect manner. Labeled cDNAs from treated and from control cells were cohybridized in a dye-swap arrangement to eliminate dye bias. Three biological replicates for each condition were hybridized in this manner, resulting in 6 replicated hybridizations for each time point. Hybridized arrays were scanned at 10- $\mu\text{m}$  resolution on a GenePix 4000B microarray scanner running GenePix 5.0 software (Axon Instruments) at variable photomultiplier tube voltages (pmt) to obtain maximal signal intensities with 1% probe saturation. A second scan was performed at a lower pmt to avoid any saturated spots to obtain accurate signal values of saturated spots at the higher pmt setting. The intensity data from these two scans allowed us to detect higher numbers of genes than by single scan. Array data (images and sample intensity files) were deposited at the NCI microarray database (mAdb, <http://nciarray.nci.nih.gov/index.shtml>), filtered and normalized. Our quality standard required each spot to have a signal to background ratio of at least 2 for one of the two channels and at least 50 foreground pixels. Cy3: Cy5 intensity ratios were normalized by median centering of ratios for each array. After inverting the ratios of the reciprocal experiments, data were transformed to logarithmic scale to the base 2 for statistical calculations. The data were analyzed separately for each of the pmt scans and then were merged into a single set. Merging of two data sets was done considering that the normalized expression ratios are independent of pmt setting and signal saturation results in lower fold change. Any duplicated probes between the two pmt settings were therefore singled out by selecting either low or high pmt that gave highest differential expression among all arrays. Differentially expressed genes between  $\alpha\text{MSH}$ - or ASP-treated versus control samples were identified using one-sample *t*-tests. Treated-to-control sample ratios were calculated using geometric averages of the replicates. Changes in gene expression were considered significant (at  $P \leq 0.01$ ) when up- or down-regulated by at least 1.5-fold by ASP and/or by  $\alpha\text{MSH}$ , after averaging the replicates, and when data were present for at least half of the six replicates. Global expression changes are considered to be statistically significant, since the number of genes differentially expressed at  $P < 0.01$  were found to be about 5-fold larger than estimated false discoveries at this *P* value. Since multiple oligo probes may map to the same locus link, the numbers of genes indicated in the Tables refer to the features on the array. Functional classification was performed using the Database for Annotation, Visualization and Integrated Discovery (DAVID, release 2.1) online tools <http://david.abcc.ncifcrf.gov/home.jsp> (1, 2). The gene-enrichment of functional pathways was measured by determining the number of genes belonging to the pathway in the list of

significantly altered genes weighed against the total murine genome using the Fisher Exact test.

**Principal Component Analysis (PCA).** PCA was performed using Partek Pro 5.1 (Partek) to allow the visual representation of variance in replicate averaged gene expression data. The correlation matrix was minimized to obtain principal components (PC). The percentage of total variance covered by each PC is shown as % on the respective axis in the 3D scatter plot. Examination of global expression patterns by PCA of  $\approx 16,400$  features having no missing data revealed clustering of samples by drug (data not shown). From these, a subset of 1,715 features altered by 1.5-fold at  $P < 0.01$  either by ASP or  $\alpha\text{MSH}$  treatment at any time point were selected. PCA of these features was used to study the variance between the ASP and  $\alpha\text{MSH}$  and with time.

**Hierarchical Clustering.** Hierarchical clustering of expression patterns was performed using Cluster and Tree View programs (3) for visualization of ASP and  $\alpha\text{MSH}$  treatment response together. Replicate averages of logarithmic ratios were used for agglomerative clustering. Genes were clustered using  $1-\rho$  as the distance measure where  $\rho$  is the correlation coefficient and the nodes were joined by an average linkage algorithm. Treated to untreated expression ratios are shown by heat map using red and green color codes for up- and down-regulation, respectively. The experiments were ordered by drug and time in columns of the heat map for visualization of temporal patterns following treatment with ASP or  $\alpha\text{MSH}$ .

**Immunoblotting.** Melanocytes were harvested and solubilized in M-PER mammalian protein extraction buffer (Pierce Biotechnology, Rockford, IL, USA) containing Protease Inhibitor mixture (Roche). Protein concentrations of extracts were measured using the BCA protein assay kit (Pierce). Cell extracts were separated by SDS/PAGE under reducing conditions. After electrophoresis, proteins were transferred to Invitrolon polyvinylidene difluoride membranes (Invitrogen). Antigens were detected using the following antibodies: Dct ( $\alpha\text{PEP8}$ ), Tyr ( $\alpha\text{PEP7}$ ), Tyrp1 ( $\alpha\text{PEP1}$ ), Mart-1 ( $\alpha\text{PEP27h}$ ), Matp ( $\alpha\text{PEP30}$ ), Si ( $\alpha\text{PEP13}$ ), all from our own laboratory, Mif (monoclonal 6A5, was a gift from Dr. Heinz Arnheiter), *Gpnmb* (AF2330, R&D Systems), Rab38 (Novus Biological), Rab27a (20.1, BD Biosciences), Tcf4 (0.T.149, Gene Tex), Lef-1 (1C3, Gene Tex), CyclinD (AM29, Invitrogen),  $\beta$ -actin (AC-15, Abcam), GAPDH (Fl-335, Santa Cruz Biotechnology), TcfAp2a (3B5c, Developmental Studies Hybridoma Bank), CTGF (ab51704, Abcam), EphB2 (AF467, R&D), EphrinB2 (AF496, R&D), ErbB3 (AF4518, R&D), Fak2/Pyk2 (YE353, Epitomics), MelCam (H-62, Santa Cruz), and N-cadherin (EPR1792Y, Epitomics).

**Transwell Migration, Invasion, and Wound Healing Assays.** Transwell migration assays were performed using transwell Boyden chambers (8  $\mu\text{m}$  PET membrane, BD Biosciences) coated for 2 h with fibronectin (10  $\mu\text{g}/\text{ml}$ ), then rinsed with PBS. Cells were then serum deprived for 24 h; 75,000 cells were seeded in the upper chamber and incubated at 37  $^{\circ}\text{C}$  for 8 h in media containing 5% FBS, in presence of ASP (10 nM),  $\alpha\text{MSH}$  (100 nM) or were left untreated (Control). Cells remaining on the upper side of the filter were removed using cotton swabs; migrated cells were fixed and stained with Diff-Quick Stain Kit (Dade Behring); the average number of 4 chambers per condition was plotted as a

percentage of the maximal number of migrated cells. Each assay was repeated 3 times with similar results.

Invasion assays were performed using Growth Factor Reduced Matrigel Invasion Chambers (BD Biosciences); after Matrigel rehydration, 150,000 cells were seeded in the upper chamber and incubated at 37 °C for the indicated times. Treatment and staining of the cells were as described for the migration assay.

For the wound-healing assay, B16-F1 cells were seeded into 6-well culture plates. When the cells had grown to 80% confluence, a sterilized tip was used to scratch the cell monolayer. Cells were fixed and stained after 24 h and micrographs of representative fields were taken using a Leica light microscope.

**Colony Growth Assay.** Melan-a and B16F1 cells were seeded in 6-well plates (80,000 cells/plate) and cultured for 10 or 8 days, respectively, in the presence or absence of ASP, after which cells were fixed with 3% paraformaldehyde and nuclei were stained with

0.4% crystal violet solution in 20% ethanol. Pictures were taken and the crystal violet was then solubilized in 10% acetic acid; optical density was measured by spectrophotometry at 610 nm.

**PCR Analysis.** Total RNA was reverse-transcribed using SuperScript III (Invitrogen), as described above. PCR was performed using Takara's Ex Taq HS (Takara) DNA Polymerase and conditions: 5 min at 94 °C, (45 s at 94 °C, 60 s at 60 °C, and 2 min at 72 °C) × 30 or 35. Primers were as follows: Tcfap2a-sense 5'-CGGGTCGCCT-GTCGCTCCTCA-3'; Tcfap2a-antisense 5'-TTTCTTGCCACTT-GCTCATTG-3'; CTGF-sense 5'-TCGGTGTACCGCAGGTGA-GTC-3'; CTGF-antisense 5'-TCCACTCTGTGGTCTGGACC-AGG-3'; ErbB3-sense 5'-CTTACGGGACACAATGCTGA-3'; ErbB3-antisense; 5'-GGCAAACTTCCCATCGTAGA; Efnb2-sense 5'-ATATCTACATCAAATGGGTCTTTGG-3'; Efnb2-antisense 5'-TGCGGTGCTCCTGCGGTACTTGAGC-3'; N-cad-sense 5'-ACTGAGGAGCCGATGAAGGAACCAC-3'; N-cad-antisense 5'-GTTGATGATGAAGATGCCCGTTGGA-3'.

1. Dennis G, Jr, et al. (2003) DAVID: Database for annotation, visualization, and integrated discovery. *Genome Biol* 4:3.
2. Hosack DA, et al. (2003) Identifying biological themes within lists of genes with EASE. *Genome Biol* 4:R70.
3. Eisen MB, Spellman PT, Brown PO, Botstein D (1998) Cluster analysis and display of genome-wide expression patterns. *Proc Natl Acad Sci USA* 95:14863–14868.





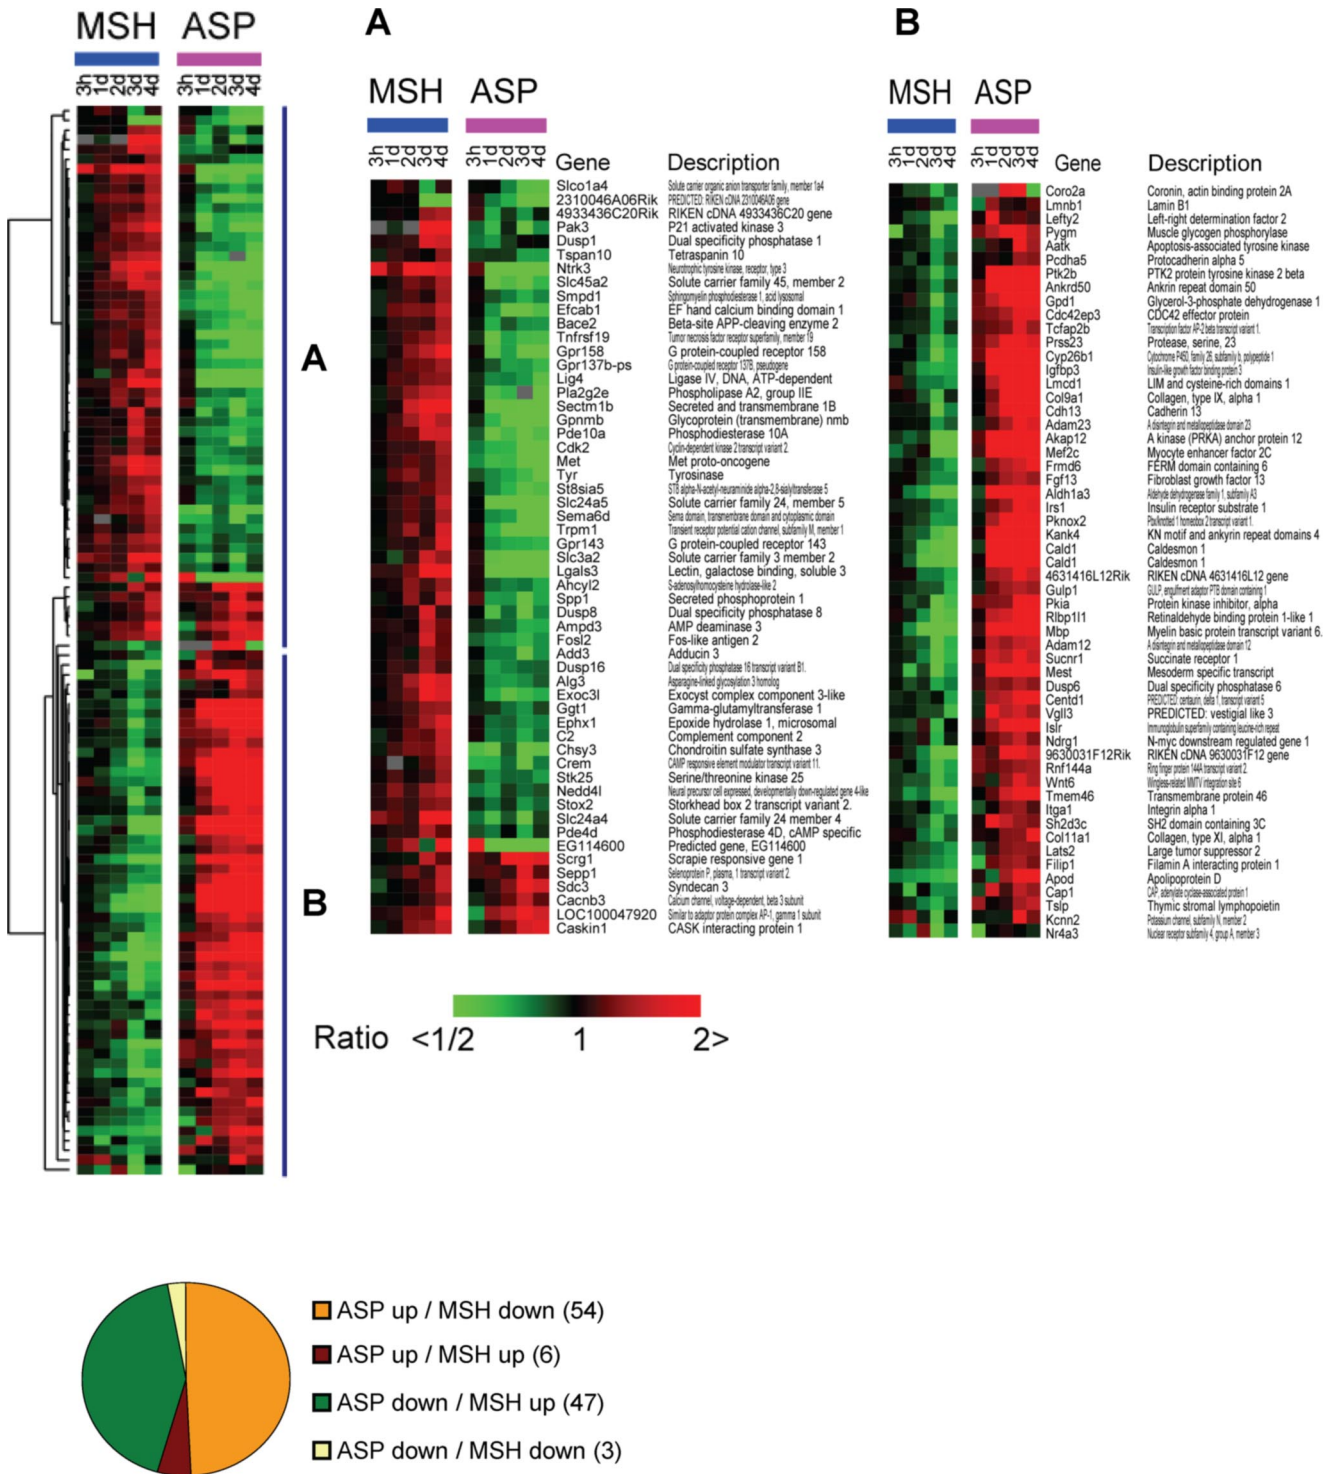

**Fig. S2.** Hierarchical clustering of genes significantly altered by both ASP and  $\alpha$ MSH for at least one time point. The opposite regulatory effects of Mc1r agonist and inverse agonist, as expected, are emphasized by the heat map, as well as differences between the various times of treatment. Subclusters of genes up-regulated by  $\alpha$ MSH for which 89% were down-regulated by ASP; and of genes down-regulated by  $\alpha$ MSH for which 95% were up-regulated by ASP are shown. The log<sub>2</sub>-fold changes of gene ratios are color coded as shown in the bar.

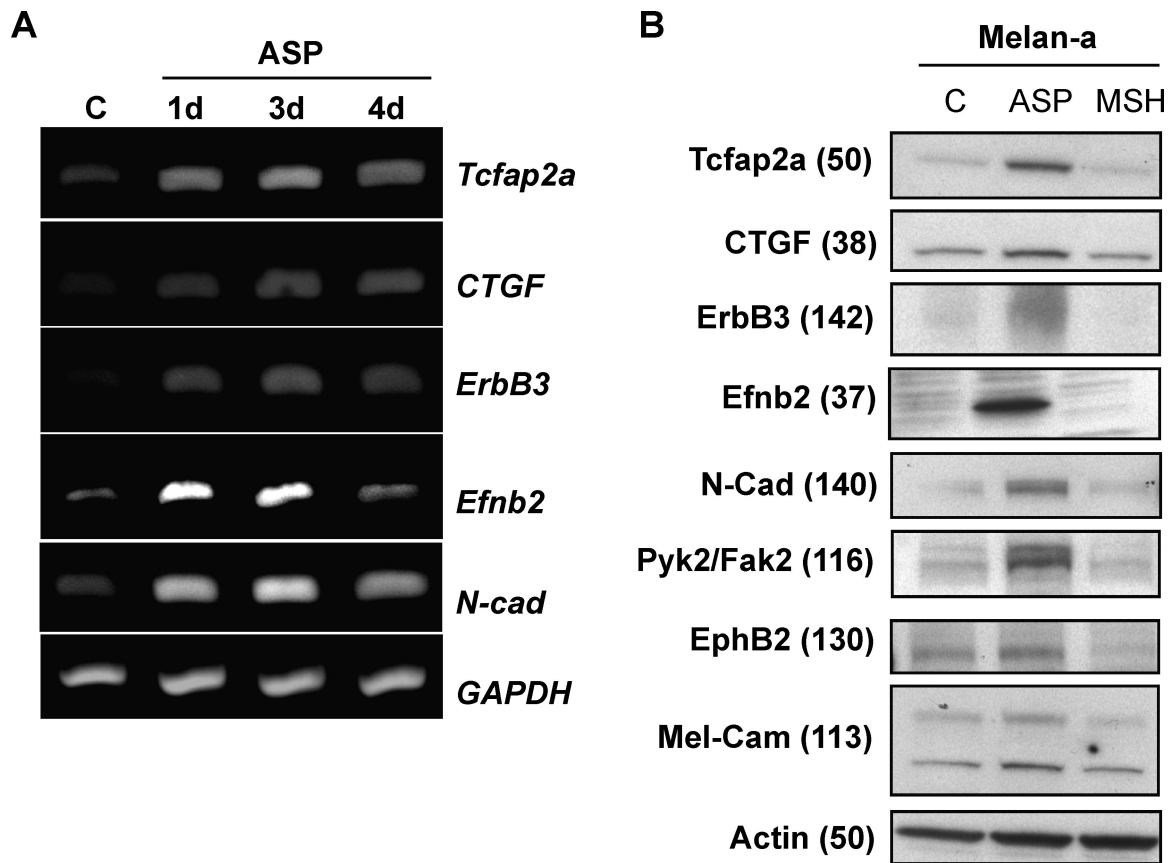

**Fig. S3.** Validation of the inducing effects of ASP on developmental genes and their products. (A) Semiquantitative PCR was performed on *Tcfap2a*, *CTGF*, *ErbB3*, *Efnb2* and *N-cadherin* in melan-a melanocytes treated with ASP for the different times indicated to confirm their mRNA expression levels. (B) Protein expression levels of those genes, as well as *Pyk2/Fak2*, *EphB2* and *Mel-Cam* (all involved in cell adhesion or migration during development), were investigated using immunoblotting after 3 days of treatment with ASP or  $\alpha$ MSH. The concomitant induction of these molecules reveals novel targets of Mc1r signaling.

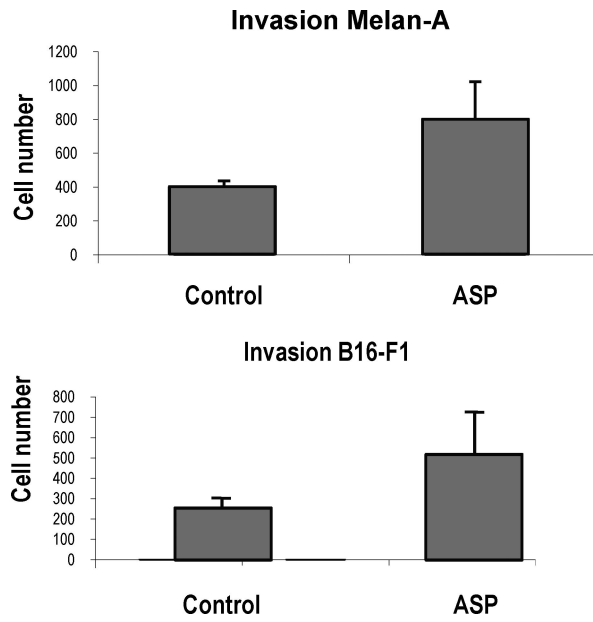

**Fig. S4.** ASP increases the invasiveness of melan-a melanocytes and of B16F1 melanoma cells. Cells were seeded in Matrigel Invasion Chambers in presence of ASP or were left untreated (Control). Melan-a and B16F1 cells were incubated at 37 °C for 24 or 8 h, respectively, and then were fixed and stained. Data are expressed as number of cells and are representative of at least 2 experiments.

**Table S1. Detailed analysis using DAVID of over-represented GO Biological Process (BP), molecular function (MF), cellular component (CC), and Kegg pathways of the 110 genes significantly altered by both ASP and  $\alpha$ MSH (treated/control ratio  $\geq 1.5$  ( $P < 0.01$ ) for at least 1 time point over 5**

| Category      | Term                                                      | Count | %      | P value | Genes                                                                                                                                                                               | List total | Pop hits | Pop total | Fold enrichment |
|---------------|-----------------------------------------------------------|-------|--------|---------|-------------------------------------------------------------------------------------------------------------------------------------------------------------------------------------|------------|----------|-----------|-----------------|
| GOTERM_BP_ALL | GO:0006796~phosphate metabolic process                    | 12    | 11.11% | 0.0117  | Aatk, Met, Dusp6, Dusp8, Ptk2b, Ntrk3, Pak3, Cdk2, Dusp1, Igfbp3, Lats2, Dusp16                                                                                                     | 84         | 912      | 14977     | 2.3             |
| GOTERM_BP_ALL | GO:0006793~phosphorus metabolic process                   | 12    | 11.11% | 0.0117  | Aatk, Met, Dusp6, Dusp8, Ptk2b, Ntrk3, Pak3, Cdk2, Dusp1, Igfbp3, Lats2, Dusp16                                                                                                     | 84         | 912      | 14977     | 2.3             |
| GOTERM_BP_ALL | GO:0048856~anatomical structure development               | 20    | 18.52% | 0.0159  | Cap1, Cdc42ep3, Farp2, Col11a1, Igfbp3, Lgals3, Sema6d, Mbp, Met, Wnt6, Lig4, Spp1, Cyp26b1, Nr4a3, Lefty2, Sepp1, Tcfap2b, Aldh1a3, Ntrk3, Mef2c                                   | 84         | 2058     | 14977     | 1.7             |
| GOTERM_BP_ALL | GO:0043687~post-translational protein modification        | 15    | 13.89% | 0.0255  | Dusp6, Dusp8, Ptk2b, Pak3, Cdk2, Dusp16, Igfbp3, Rnf144, Aatk, Met, Nedd4l, Ntrk3, Bace2, Dusp1, Lats2                                                                              | 84         | 1435     | 14977     | 1.9             |
| GOTERM_BP_ALL | GO:0033673~negative regulation of kinase activity         | 3     | 2.78%  | 0.0258  | Pkia, Lats2, Dusp16                                                                                                                                                                 | 84         | 45       | 14977     | 11.9            |
| GOTERM_BP_ALL | GO:0006469~negative regulation of protein kinase activity | 3     | 2.78%  | 0.0258  | Pkia, Lats2, Dusp16                                                                                                                                                                 | 84         | 45       | 14977     | 11.9            |
| GOTERM_BP_ALL | GO:0051348~negative regulation of transferase activity    | 3     | 2.78%  | 0.0279  | Pkia, Lats2, Dusp16                                                                                                                                                                 | 84         | 47       | 14977     | 11.4            |
| GOTERM_BP_ALL | GO:0006583~melanin biosynthetic process from tyrosine     | 2     | 1.85%  | 0.0328  | Slc45a2, Tyr                                                                                                                                                                        | 84         | 6        | 14977     | 59.4            |
| GOTERM_BP_ALL | GO:0007399~nervous system development                     | 9     | 8.33%  | 0.0329  | Sema6d, Mbp, Met, Lig4, Sepp1, Farp2, Aldh1a3, Ntrk3, Mef2c                                                                                                                         | 84         | 674      | 14977     | 2.4             |
| GOTERM_BP_ALL | GO:0006470~protein amino acid dephosphorylation           | 4     | 3.70%  | 0.0342  | Dusp6, Dusp8, Dusp1, Dusp16                                                                                                                                                         | 84         | 128      | 14977     | 5.6             |
| GOTERM_BP_ALL | GO:0022610~biological adhesion                            | 9     | 8.33%  | 0.0342  | Gpnmb, Adam12, Itga1, Spp1, Cdh13, Col9a1, Col11a1, Adam23, Pcdha5                                                                                                                  | 84         | 679      | 14977     | 2.4             |
| GOTERM_BP_ALL | GO:0007155~cell adhesion                                  | 9     | 8.33%  | 0.0342  | Gpnmb, Adam12, Itga1, Spp1, Cdh13, Col9a1, Col11a1, Adam23, Pcdha5                                                                                                                  | 84         | 679      | 14977     | 2.4             |
| GOTERM_BP_ALL | GO:0006464~protein modification process                   | 16    | 14.81% | 0.0360  | Dusp6, Dusp8, Ptk2b, St8 sia5, Pak3, Cdk2, Dusp16, Igfbp3, Aatk, Rnf144, Met, Nedd4l, Ntrk3, Bace2, Dusp1, Lats2                                                                    | 84         | 1648     | 14977     | 1.7             |
| GOTERM_BP_ALL | GO:0032502~developmental process                          | 25    | 23.15% | 0.0368  | Cdc42ep3, Col11a1, Pak3, Lgals3, Igfbp3, Aatk, Met, Wnt6, Lig4, Nr4a3, Sepp1, Tcfap2b, Mef2c, Cap1, Gulp1, Ndr1, Farp2, Slc45a2, Mbp, Sema6d, Cyp26b1, Spp1, Lefty2, Ntrk3, Aldh1a3 | 84         | 3028     | 14977     | 1.5             |
| GOTERM_BP_ALL | GO:0043086~negative regulation of catalytic activity      | 3     | 2.78%  | 0.0424  | Pkia, Lats2, Dusp16                                                                                                                                                                 | 84         | 59       | 14977     | 9.1             |
| GOTERM_BP_ALL | GO:0016311~dephosphorylation                              | 4     | 3.70%  | 0.0466  | Dusp6, Dusp8, Dusp1, Dusp16                                                                                                                                                         | 84         | 145      | 14977     | 4.9             |
| GOTERM_BP_ALL | GO:0043412~biopolymer modification                        | 16    | 14.81% | 0.0489  | Dusp6, Dusp8, Ptk2b, St8 sia5, Pak3, Cdk2, Dusp16, Igfbp3, Aatk, Rnf144, Met, Nedd4l, Ntrk3, Bace2, Dusp1, Lats2                                                                    | 84         | 1717     | 14977     | 1.7             |
| GOTERM_BP_ALL | GO:0050790~regulation of catalytic activity               | 6     | 5.56%  | 0.0495  | Cap1, Met, Centd1, Pkia, Lats2, Dusp16                                                                                                                                              | 84         | 360      | 14977     | 3.0             |
| GOTERM_BP_ALL | GO:0006582~melanin metabolic process                      | 2     | 1.85%  | 0.0541  | Slc45a2, Tyr                                                                                                                                                                        | 84         | 10       | 14977     | 35.7            |
| GOTERM_BP_ALL | GO:0042573~retinoic acid metabolic process                | 2     | 1.85%  | 0.0541  | Cyp26b1, Aldh1a3                                                                                                                                                                    | 84         | 10       | 14977     | 35.7            |

| Category      | Term                                                                        | Count | %      | P value | Genes                                                                                                                                                                             | List total | Pop hits | Pop total | Fold enrichment |
|---------------|-----------------------------------------------------------------------------|-------|--------|---------|-----------------------------------------------------------------------------------------------------------------------------------------------------------------------------------|------------|----------|-----------|-----------------|
| GOTERM_BP_ALL | GO:0042438~melanin biosynthetic process                                     | 2     | 1.85%  | 0.0541  | Slc45a2, Tyr                                                                                                                                                                      | 84         | 10       | 14977     | 35.7            |
| GOTERM_BP_ALL | GO:0048731~system development                                               | 16    | 14.81% | 0.0559  | Farp2, Col11a1a, Igfbp3, Lgals3, Mbp, Sema6d, Met, Wnt6, Lig4, Spp1, Nr4a3, Sepp1, Tcfap2b, Aldh1a3, Ntrk3, Mef2c                                                                 | 84         | 1749     | 14977     | 1.6             |
| GOTERM_BP_ALL | GO:0045859~regulation of protein kinase activity                            | 4     | 3.70%  | 0.0647  | Met, Pkia, Lats2, Dusp16                                                                                                                                                          | 84         | 166      | 14977     | 4.3             |
| GOTERM_BP_ALL | GO:0006811~ion transport                                                    | 9     | 8.33%  | 0.0684  | Slco1a4, Slc24a4, Trpm1, Col9a1, Slc24a5, Col11a1, Kcnn2, Cacnb3, Cdk2                                                                                                            | 84         | 784      | 14977     | 2.0             |
| GOTERM_BP_ALL | GO:0006813~potassium ion transport                                          | 4     | 3.70%  | 0.0694  | Slc24a4, Slc24a5, Kcnn2, Cdk2                                                                                                                                                     | 84         | 171      | 14977     | 4.2             |
| GOTERM_BP_ALL | GO:0006570~tyrosine metabolic process                                       | 2     | 1.85%  | 0.0697  | Slc45a2, Tyr                                                                                                                                                                      | 84         | 13       | 14977     | 27.4            |
| GOTERM_BP_ALL | GO:0007275~multicellular organismal development                             | 19    | 17.59% | 0.0702  | Farp2, Col11a1a, Pak3, Igfbp3, Lgals3, Sema6d, Mbp, Met, Wnt6, Lig4, Spp1, Cyp26b1, Nr4a3, Lefty2, Sepp1, Tcfap2b, Aldh1a3, Ntrk3, Mef2c                                          | 84         | 2270     | 14977     | 1.5             |
| GOTERM_BP_ALL | GO:0043549~regulation of kinase activity                                    | 4     | 3.70%  | 0.0713  | Met, Pkia, Lats2, Dusp16                                                                                                                                                          | 84         | 173      | 14977     | 4.1             |
| GOTERM_BP_ALL | GO:0006468~protein amino acid phosphorylation                               | 8     | 7.41%  | 0.0730  | Aatk, Met, Ptk2b, Ntrk3, Pak3, Cdk2, Igfbp3, Lats2                                                                                                                                | 84         | 660      | 14977     | 2.2             |
| GOTERM_BP_ALL | GO:0051338~regulation of transferase activity                               | 4     | 3.70%  | 0.0772  | Met, Pkia, Lats2, Dusp16                                                                                                                                                          | 84         | 179      | 14977     | 4.0             |
| GOTERM_BP_ALL | GO:0019538~protein metabolic process                                        | 25    | 23.15% | 0.0786  | Ephx1, Dusp6, Dusp8, Col11a1a, Pak3, Cdk2, Dusp16, Igfbp3, Rnf144, Aatk, Adam12, Met, Ap1 g1, Nedd4l, Prss23, Bace2, Mest, Adam23, Lats2, Ptk2b, St8 sia5, Pygm, C2, Ntrk3, Dusp1 | 84         | 3268     | 14977     | 1.4             |
| GOTERM_BP_ALL | GO:0007243~protein kinase cascade                                           | 5     | 4.63%  | 0.0797  | Irs1, Met, Fgf13, Lats2, Dusp16                                                                                                                                                   | 84         | 293      | 14977     | 3.0             |
| GOTERM_BP_ALL | GO:0065009~regulation of a molecular function                               | 6     | 5.56%  | 0.0804  | Cap1, Met, Centd1, Pkia, Lats2, Dusp16                                                                                                                                            | 84         | 415      | 14977     | 2.6             |
| GOTERM_BP_ALL | GO:0007169~transmembrane receptor protein tyrosine kinase signaling pathway | 4     | 3.70%  | 0.0844  | Irs1, Met, Ptk2b, Ntrk3                                                                                                                                                           | 84         | 186      | 14977     | 3.8             |
| GOTERM_BP_ALL | GO:0001501~skeletal development                                             | 4     | 3.70%  | 0.0854  | Spp1, Col11a1a, Mef2c, Lgals3                                                                                                                                                     | 84         | 187      | 14977     | 3.8             |
| GOTERM_BP_ALL | GO:0009888~tissue development                                               | 5     | 4.63%  | 0.0868  | Spp1, Nr4a3, Ntrk3, Col11a1a, Mef2c                                                                                                                                               | 84         | 302      | 14977     | 3.0             |
| GOTERM_BP_ALL | GO:0048513~organ development                                                | 13    | 12.04% | 0.0899  | Col11a1a, Lgals3, Igfbp3, Met, Wnt6, Lig4, Spp1, Nr4a3, Sepp1, Tcfap2b, Ntrk3, Aldh1a3, Mef2c                                                                                     | 84         | 1416     | 14977     | 1.6             |
| GOTERM_BP_ALL | GO:0042445~hormone metabolic process                                        | 3     | 2.78%  | 0.0923  | Cyp26b1, Aldh1a3, Bace2                                                                                                                                                           | 84         | 92       | 14977     | 5.8             |
| GOTERM_BP_ALL | GO:0044260~cellular macromolecule metabolic process                         | 24    | 22.22% | 0.0933  | Dusp6, Ephx1, Dusp8, Ptk2b, St8 sia5, Col11a1a, Pak3, Cdk2, Igfbp3, Dusp16, Aatk, Rnf144, Met, Adam12, Pygm, Nedd4l, C2, Bace2, Prss23, Ntrk3, Mest, Adam23, Dusp1, Lats2         | 84         | 3165     | 14977     | 1.4             |
| GOTERM_CC_ALL | GO:0044421~extracellular region part                                        | 23    | 21.30% | 0.0037  | Apod, Ephx1, Islr, Col11a1a, Igfbp3, Lgals3, Tnfrsf19, Met, Adam12, Wnt6, Spp1, Lefty2, Sepp1, Tyr, C2, Col9a1, Gpr143, Tslp, Bace2, Prss23, Ntrk3, Mest, Scrg1                   | 89         | 2195     | 15845     | 1.9             |



| Category      | Term                                                                 | Count | %      | P value | Genes                                                                                                                                                                                                                                                                                                                                         | List total | Pop hits | Pop total | Fold enrichment |
|---------------|----------------------------------------------------------------------|-------|--------|---------|-----------------------------------------------------------------------------------------------------------------------------------------------------------------------------------------------------------------------------------------------------------------------------------------------------------------------------------------------|------------|----------|-----------|-----------------|
| GOTERM_CC_ALL | GO:0005576~extracellular region                                      | 23    | 21.30% | 0.0094  | Apod, Ephx1, Islr, Col11a1, Igfbp3, Lgals3, Tnfrsf19, Met, Adam12, Wnt6, Spp1, Lefty2, Sepp1, Tyr, C2, Col9a1, Gpr143, Tslp, Bace2, Prss23, Ntrk3, Mest, Scrg1                                                                                                                                                                                | 89         | 2375     | 15845     | 1.7             |
| GOTERM_CC_ALL | GO:0005856~cytoskeleton                                              | 12    | 11.11% | 0.0167  | Cap1, Lmn1b1, Akap12, Cdc42ep3, Frmd6, Pknox2, Ptk2b, Cald1, Pde4d, Farp2, Add3, Lats2                                                                                                                                                                                                                                                        | 89         | 957      | 15845     | 2.2             |
| GOTERM_CC_ALL | GO:0005615~extracellular space                                       | 20    | 18.52% | 0.0172  | Apod, Ephx1, Islr, Igfbp3, Tnfrsf19, Met, Wnt6, Spp1, Lefty2, Sepp1, Tyr, C2, Col9a1, Gpr143, Tslp, Prss23, Ntrk3, Bace2, Mest, Scrg1                                                                                                                                                                                                         | 89         | 2064     | 15845     | 1.7             |
| GOTERM_CC_ALL | GO:0005624~membrane fraction                                         | 8     | 7.41%  | 0.0175  | Irs1, Ephx1, Met, Slco1a4, Cyp26b1, Cald1, Bace2, Pcdha5                                                                                                                                                                                                                                                                                      | 89         | 481      | 15845     | 3.0             |
| GOTERM_CC_ALL | GO:0005578~proteinaceous extracellular matrix                        | 6     | 5.56%  | 0.0242  | Adam12, Wnt6, Spp1, Col9a1, Col11a1, Lgals3                                                                                                                                                                                                                                                                                                   | 89         | 295      | 15845     | 3.6             |
| GOTERM_CC_ALL | GO:0031012~extracellular matrix                                      | 6     | 5.56%  | 0.0268  | Adam12, Wnt6, Spp1, Col9a1, Col11a1, Lgals3                                                                                                                                                                                                                                                                                                   | 89         | 303      | 15845     | 3.5             |
| GOTERM_CC_ALL | GO:0000267~cell fraction                                             | 8     | 7.41%  | 0.0323  | Irs1, Ephx1, Met, Slco1a4, Cyp26b1, Cald1, Bace2, Pcdha5                                                                                                                                                                                                                                                                                      | 89         | 547      | 15845     | 2.6             |
| GOTERM_CC_ALL | GO:0030864~cortical actin cytoskeleton                               | 2     | 1.85%  | 0.0802  | Cap1, Cald1                                                                                                                                                                                                                                                                                                                                   | 89         | 15       | 15845     | 23.7            |
| GOTERM_CC_ALL | GO:0005737~cytoplasm                                                 | 39    | 36.11% | 0.0916  | Dusp6, Ephx1, Cdc42ep3, Smpd1, Frmd6, Dusp8, Fgf13, Caskin1, Col11a1, Dusp16, Lgals3, Aatk, Ap1 g1, Nedd4l, Tyr, Cald1, Alg3, Lats2, Cap1, Gulp1, Akap12, Ndr1, Centd1, Ptk2b, Pde4d, Sh2d3c, Farp2, Add3, St8 sia5, Mbp, Irs1, Gpnmb, Pygm, Spp1, Pknox2, Col9a1, Aldh1a3, Ntrk3, Gpd1                                                       | 89         | 5672     | 15845     | 1.2             |
| GOTERM_MF_ALL | GO:0017017~MAP kinase tyrosine/serine/threonine phosphatase activity | 4     | 3.70%  | 0.0000  | Dusp6, Dusp8, Dusp1, Dusp16                                                                                                                                                                                                                                                                                                                   | 92         | 10       | 16377     | 71.2            |
| GOTERM_MF_ALL | GO:0033549~MAP kinase phosphatase activity                           | 4     | 3.70%  | 0.0000  | Dusp6, Dusp8, Dusp1, Dusp16                                                                                                                                                                                                                                                                                                                   | 92         | 10       | 16377     | 71.2            |
| GOTERM_MF_ALL | GO:0008138~protein tyrosine/serine/threonine phosphatase activity    | 4     | 3.70%  | 0.0014  | Dusp6, Dusp8, Dusp1, Dusp16                                                                                                                                                                                                                                                                                                                   | 92         | 40       | 16377     | 17.8            |
| GOTERM_MF_ALL | GO:0005515~protein binding                                           | 47    | 43.52% | 0.0021  | Dusp6, Cdc42ep3, Fgf13, Crem, Cacnb3, Pak3, Lmcd1, Cdk2, Pcdha5, Igfbp3, Dusp16, Lgals3, Rnf144, Met, Adam12, Ap1 g1, Wnt6, Cdh13, Nedd4l, Tcfap2b, Tyr, Cald1, Tslp, Kcnn2, Adam23, Mef2c, Cap1, Sdc3, Apod, Gulp1, Itga1, Akap12, Islr, Ptk2b, Farp2, Add3, Irs1, Gpnmb, Tnfrsf19, Fosl2, Pygm, Spp1, Slc3a2, Lefty2, Pknox2, Coro2a, Ntrk3 | 92         | 5794     | 16377     | 1.4             |
| GOTERM_MF_ALL | GO:0032403~protein complex binding                                   | 4     | 3.70%  | 0.0050  | Irs1, Gpnmb, Spp1, Lgals3                                                                                                                                                                                                                                                                                                                     | 92         | 62       | 16377     | 11.5            |
| GOTERM_MF_ALL | GO:0042578~phosphoric ester hydrolase activity                       | 7     | 6.48%  | 0.0084  | Dusp6, Smpd1, Pde10a, Dusp8, Pde4d, Dusp1, Dusp16                                                                                                                                                                                                                                                                                             | 92         | 317      | 16377     | 3.9             |

| Category      | Term                                                 | Count | %     | <i>P</i> value | Genes                                                       | List total | Pop hits | Pop total | Fold enrichment |
|---------------|------------------------------------------------------|-------|-------|----------------|-------------------------------------------------------------|------------|----------|-----------|-----------------|
| GOTERM_MF_ALL | GO:0016801~hydrolase activity, acting on ether bonds | 2     | 1.85% | 0.0489         | Ephx1, 4631427C17Rik                                        | 92         | 9        | 16377     | 39.6            |
| GOTERM_MF_ALL | GO:0008081~phosphoric diester hydrolase activity     | 3     | 2.78% | 0.0578         | Smpd1, Pde10a, Pde4d                                        | 92         | 70       | 16377     | 7.6             |
| GOTERM_MF_ALL | GO:0004721~phosphoprotein phosphatase activity       | 4     | 3.70% | 0.0588         | Dusp6, Dusp8, Dusp1, Dusp16                                 | 92         | 159      | 16377     | 4.5             |
| GOTERM_MF_ALL | GO:0008092~cytoskeletal protein binding              | 6     | 5.56% | 0.0690         | Cap1, Sdc3, Pknox2, Coro2a, Cald1, Farp2                    | 92         | 395      | 16377     | 2.7             |
| GOTERM_MF_ALL | GO:0046983~protein dimerization activity             | 5     | 4.63% | 0.0743         | Fosl2, Cdh13, Tcfap2b, Tyr, Crem                            | 92         | 285      | 16377     | 3.1             |
| GOTERM_MF_ALL | GO:0016788~hydrolase activity, acting on ester bonds | 8     | 7.41% | 0.0865         | Dusp6, Pla2 g2e, Smpd1, Pde10a, Dusp8, Pde4d, Dusp1, Dusp16 | 92         | 685      | 16377     | 2.1             |
| GOTERM_MF_ALL | GO:0004725~protein tyrosine phosphatase activity     | 3     | 2.78% | 0.0979         | Dusp6, Dusp8, Dusp1                                         | 92         | 95       | 16377     | 5.6             |
| KEGG_PATHWAY  | mmu04010:MAPK signaling pathway                      | 8     | 7.41% | 0.0116         | Dusp6, Pla2 g2e, Dusp8, Fgf13, Cacnb3, Dusp1, Mef2c, Dusp16 | 42         | 252      | 4079      | 3.1             |
| KEGG_PATHWAY  | mmu04510:Focal adhesion                              | 6     | 5.56% | 0.0415         | Met, Itga1, Spp1, Farp2, Col11a1, Pak3                      | 42         | 192      | 4079      | 3.0             |
| KEGG_PATHWAY  | mmu04512:ECM-receptor interaction                    | 4     | 3.70% | 0.0513         | Sdc3, Itga1, Spp1, Col11a1                                  | 42         | 84       | 4079      | 4.6             |

**Table S2. ASP-altered genes coding for melanosomal proteins expressed in melanosomes of MNT-1 melanocytic cells**

| Gene      | Description                                                                                                | ASP   |       |       |       |       | MSH   |       |       |       |       |
|-----------|------------------------------------------------------------------------------------------------------------|-------|-------|-------|-------|-------|-------|-------|-------|-------|-------|
|           |                                                                                                            | 3 h   | 1d    | 2d    | 3d    | 4d    | 3 h   | 1d    | 2d    | 3d    | 4d    |
| aars      | alanyl-tRNA synthetase                                                                                     | 0.09  | -0.38 | -0.71 | -0.76 | -0.76 | 0.01  | -0.06 | -0.11 | 0.38  | 0.12  |
| Amid      | apoptosis-inducing factor (AIF)-like<br>mitochondrion-associated inducer of death,<br>transcript variant 2 | 0.02  | -0.18 | -0.04 | -0.60 | -0.39 | 0.14  | -0.16 | 0.38  | 0.30  | 0.17  |
| Ascc3     | PREDICTED: activating signal cointegrator 1<br>complex subunit 3, transcript variant 1                     | 0.12  | -0.44 | -0.50 | -0.74 | -0.36 | 0.13  | 0.35  | -0.01 | 0.12  | -0.13 |
| Atp6v0a1  | ATPase, H + transporting, lysosomal V0 subunit<br>A1                                                       | -0.03 | -0.32 | -0.25 | -0.60 | -0.55 | -0.04 | 0.18  | 0.22  | 0.29  | 0.54  |
| Atp6v1 g1 | ATPase, H + transporting, lysosomal V1 subunit<br>G1                                                       | 0.07  | -0.28 | -0.36 | -0.59 | -0.59 | 0.08  | 0.08  | 0.04  | -0.08 | 0.25  |
| Bace2     | beta-site APP-cleaving enzyme 2                                                                            | -0.08 | -0.72 | -0.34 | -0.59 | -0.62 | -0.03 | 0.24  | 0.29  | 0.24  | 0.68  |
| Cacybp    | calcyclin binding protein                                                                                  | 0.12  | -0.12 | -0.49 | -0.64 | -0.20 | 0.11  | 0.05  | 0.14  | -0.11 | -0.24 |
| Cd44      | CD44 antigen, transcript variant 2                                                                         | -0.51 | -0.17 | -0.03 | -0.97 | -0.27 | -0.71 |       |       |       |       |
| Cdk2      | cyclin-dependent kinase 2, transcript variant 2                                                            | -0.50 | -0.74 | -0.76 | -1.08 | -1.13 | 0.06  | 0.23  | 0.24  | 0.33  | 0.69  |
| Ctsb      | cathepsin B                                                                                                | 0.39  | -0.18 | -0.25 | -0.53 | -0.31 | 0.01  | 0.23  | 0.65  | 0.53  | 0.74  |
| Dhcr7     | 7-dehydrocholesterol reductase                                                                             | 0.19  | -0.17 | -0.22 | -0.51 | -0.68 | 0.00  | -0.06 | 0.15  | 0.08  | 0.51  |
| Dusp3     | dual specificity phosphatase 3 (vaccinia virus<br>phosphatase VH1-related)                                 | -0.29 | -0.17 | -0.97 | -0.60 | -0.05 | -0.05 | 0.02  | 0.13  | 0.34  | -0.17 |
| Epb4.1l3  | erythrocyte protein band 4.1-like 3                                                                        | 0.02  | -0.37 | -0.18 | -0.59 | -0.51 | 0.07  | 0.03  | 0.18  | 0.29  | 0.16  |
| Ephx1     | epoxide hydrolase 1, microsomal                                                                            | 0.09  | -0.43 | -0.37 | -0.62 | -0.53 | 0.01  | 0.08  | 0.34  | 0.66  | 0.91  |
| Eprs      | glutamyl-prolyl-tRNA synthetase                                                                            | 0.36  | -0.46 | -0.49 | -0.88 | -0.72 | 0.10  | -0.09 | 0.05  | 0.20  | 0.07  |
| Eps8      | epidermal growth factor receptor pathway<br>substrate 8                                                    | -0.31 | -0.76 | -0.81 | -0.90 | -0.96 | 0.05  | 0.20  | -0.02 | 0.10  | 0.17  |
| Fars1b    | phenylalanine-tRNA synthetase-like, beta subunit                                                           | 0.29  | -0.32 | -0.32 | -0.72 | -0.65 | 0.01  | -0.17 | 0.09  | -0.15 | -0.03 |
| Frrs1     | ferric-chelate reductase 1                                                                                 | 0.27  | -0.55 | -0.39 | -0.62 | -0.36 | -0.07 | 0.05  | 0.26  | 0.09  | 0.24  |
| Gpd2      | glycerol phosphate dehydrogenase 2,<br>mitochondrial                                                       | -0.04 | -0.15 | -0.41 | -0.39 | -0.63 | -0.06 | -0.03 | 0.00  | 0.34  | 0.17  |
| Gpnmb     | glycoprotein (transmembrane) nmb                                                                           | -0.08 | -0.75 | -1.13 | -1.37 | -1.14 | 0.04  | 0.20  | 0.62  | 1.00  | 0.94  |
| Gsr       | glutathione reductase 1                                                                                    | 0.26  | -0.28 | -0.69 | -0.99 | -0.58 | 0.02  | 0.04  | 0.08  | 0.22  | 0.13  |
| Gstp1     | glutathione S-transferase, pi 1                                                                            | -0.02 | -0.17 | -0.61 | -0.66 | -0.39 | -0.03 | -0.07 | 0.29  | 0.10  | 0.42  |
| Hbs1l     | Hbs1-like ( <i>S. cerevisiae</i> )                                                                         | 0.23  | -0.45 | -0.60 | -0.17 | -0.04 | 0.02  | -0.04 | 0.01  | 0.00  | 0.29  |
| Hspa4l    | Heat shock protein 4 like                                                                                  | 0.17  | -0.20 | -0.22 | -0.81 | -0.35 | 0.04  | -0.23 | 0.04  | -0.25 | -0.02 |
| Hspa9a    | heat shock protein 9A                                                                                      | 0.32  | -0.71 | -0.82 | -1.05 | -0.74 | 0.01  | -0.25 | 0.09  | 0.59  | 0.07  |
| Hyou1     | hypoxia up-regulated 1                                                                                     | 0.09  | -0.29 | 0.10  | -0.28 | 0.06  | -0.05 | -0.21 | -0.09 | 0.61  | -0.49 |
| Iqgap1    | IQ motif containing GTPase activating protein 1                                                            | 0.03  | 0.06  | -0.16 | -0.93 | -0.40 | -0.06 | 0.12  | 0.21  | 0.59  | 0.10  |
| Khgrp     | KH-type splicing regulatory protein                                                                        | -0.86 | 0.47  | 0.09  | -0.16 | 0.13  | -0.09 | -0.21 | 0.12  | -0.09 | -0.33 |
| Lars      | PREDICTED: leucyl-tRNA synthetase, transcript<br>variant 3                                                 | 0.02  | -0.33 | -0.63 | -0.80 | -0.82 | -0.03 | -0.19 | -0.07 | 0.12  | -0.03 |
| Lgals3    | lectin, galactose binding, soluble 3                                                                       | 0.13  | -1.93 | -2.15 | -2.52 | -1.74 | 0.24  | 0.20  | 0.48  | 1.72  | 1.25  |
| Lrrc59    | leucine rich repeat containing 59                                                                          | 0.13  | -0.41 | -0.35 | -0.67 | -0.43 | 0.06  | -0.04 | 0.09  | 0.17  | 0.08  |
| Mif       | macrophage migration inhibitory factor                                                                     | -0.02 | -0.54 | -0.53 | -0.90 | -0.61 | 0.07  | 0.00  | 0.15  | 0.33  | 0.32  |
| Mlana     | PREDICTED: melan-A, transcript variant 1                                                                   | 0.16  | -0.27 | -0.72 | -0.81 | -0.61 | -0.08 | -0.03 | -0.01 | -0.23 | 0.05  |
| Myh11     | myosin, heavy polypeptide 11, smooth muscle                                                                | 0.08  | 0.08  | 0.14  | -0.11 | -0.40 | 0.15  | -0.08 | 0.18  | 0.08  | 0.65  |
| Nars      | asparaginyl-tRNA synthetase                                                                                | 0.16  | -0.54 | -0.86 | -0.84 | -0.79 | 0.01  | -0.10 | -0.20 | 0.29  | -0.01 |
| Nedd4l    | neural precursor cell expressed, developmentally<br>down-regulated gene 4-like                             | -0.49 | -0.66 | -0.23 | -0.43 | -0.31 | 0.16  | 0.55  | 0.26  | 0.64  | 0.80  |
| Optn      | optineurin                                                                                                 | 0.05  | -0.61 | -0.28 | -0.35 | -0.52 | 0.04  | 0.01  | 0.23  | 0.32  | 0.52  |
| Pabpc1    | Poly A binding protein, cytoplasmic 1                                                                      | -0.06 | -0.59 | -0.16 | -0.58 | -0.07 | 0.05  | -0.06 | 0.16  | 0.15  | -0.16 |
| Pabpc4    | poly A binding protein, cytoplasmic 4, transcript<br>variant 2                                             | 0.00  | -0.35 | -0.63 | -0.47 | -0.18 | 0.01  | 0.07  | 0.05  | 0.01  | 0.15  |
| Pdcd8     | programmed cell death 8                                                                                    | -0.18 | -0.19 | -0.50 | -0.60 | -0.48 | 0.02  | 0.08  | -0.04 | 0.15  | -0.05 |
| Pfkfb     | phosphofruktokinase, platelet                                                                              | 0.00  | -0.30 | -0.84 | -0.66 | -0.57 | 0.13  | -0.23 | -0.05 | 0.25  | -0.06 |
| Plscr1    | phospholipid scramblase 1                                                                                  | -0.01 | -0.28 | -0.66 | -0.52 | -0.36 | 0.02  | 0.14  | 0.21  | 0.17  | 0.18  |
| Pltp      | phospholipid transfer protein                                                                              | 0.07  | -0.28 | -0.23 | -0.81 | -0.29 | -0.11 | -0.11 | 0.02  | -0.02 | 0.22  |
| Plxnc1    | Plexin C1                                                                                                  | 0.12  | 0.08  | -0.16 | -0.34 | -0.63 | -0.09 | 0.29  | 0.17  | -0.08 | 0.42  |
| Prps1     | phosphoribosyl pyrophosphate synthetase 1                                                                  | 0.03  | -0.23 | -0.52 | -0.62 | -0.22 | 0.07  | -0.18 | -0.09 | -0.03 | 0.01  |
| Psat1     | phosphoserine aminotransferase 1                                                                           | 0.20  | -0.34 | -0.46 | -0.71 | -0.73 | -0.07 | -0.31 | -0.18 | 0.00  | -0.21 |
| Rab27a    | RAB27A, member RAS oncogene family                                                                         | 0.12  | -0.40 | -0.54 | -0.92 | -0.65 | -0.07 | 0.31  | 0.14  | 0.11  | 0.31  |
| Rab39b    | RAB39B, member RAS oncogene family                                                                         | 0.33  | -0.39 | -0.33 | -0.95 | -0.61 | 0.58  | 0.24  |       |       |       |
| Rab5b     | RAB5B, member RAS oncogene family                                                                          | -0.42 | -0.30 | -0.08 | 0.09  | 0.00  | 0.08  | 0.10  | 0.35  | 0.46  | 0.74  |
| Sars      | seryl-aminoacyl-tRNA synthetase                                                                            | -0.07 | -0.59 | -0.92 | -0.84 | -0.94 | 0.02  | -0.16 | 0.01  | 0.44  | 0.25  |
| Scpep1    | serine carboxypeptidase 1                                                                                  | 0.05  | -0.17 | -0.51 | -0.59 | -0.58 | 0.02  | 0.06  | 0.22  | 0.16  | 0.28  |

| Gene     | Description                                                                                    | ASP   |       |       |       |       | MSH   |       |       |       |       |
|----------|------------------------------------------------------------------------------------------------|-------|-------|-------|-------|-------|-------|-------|-------|-------|-------|
|          |                                                                                                | 3 h   | 1d    | 2d    | 3d    | 4d    | 3 h   | 1d    | 2d    | 3d    | 4d    |
| Serpinf1 | serine (or cysteine) peptidase inhibitor, clade F, member 1                                    | 0.21  | -0.14 | -0.11 | -0.10 | -0.23 | 0.06  | -0.08 | 0.03  | 0.75  | 0.36  |
| Sfxn1    | sideroflexin 1                                                                                 | -0.01 | -0.14 | -0.47 | -0.96 | -0.68 | 0.16  | 0.08  | -0.01 | -0.05 | 0.19  |
| Si       | silver                                                                                         | 0.05  | -0.82 | -0.01 | -1.29 | -1.13 | -0.07 | 0.23  | 0.63  | 0.50  | 0.99  |
| Slc16a6  | solute carrier family 16 (monocarboxylic acid transporters), member 6, transcript variant 2    | -0.42 | -0.60 | -0.47 | -0.61 | -0.53 | 0.15  | -0.06 | 0.44  | 0.44  | 0.49  |
| Slc1a4   | CYS transporter - solute carrier family 1 (glutamate/neutral amino acid transporter), member 4 | 0.08  | -0.74 | -1.13 | -1.56 | -1.58 | 0.00  | -0.26 | -0.10 | 0.64  | -0.06 |
| Slc1a5   | Solute carrier family 1 (neutral amino acid transporter), member 5                             | -0.21 | -0.56 | -0.88 | -0.74 | -0.48 | -0.05 | -0.52 | 0.21  | 0.47  | -0.14 |
| Slc24a5  | solute carrier family 24, member 5                                                             | -0.01 | -1.01 | -1.10 | -1.45 | -1.32 | 0.04  | 0.25  | 0.40  | 0.21  | 0.81  |
| Slc38a2  | solute carrier family 38, member 2                                                             | 0.29  | -0.11 | -0.36 | -0.51 | -0.62 | 0.11  | -0.01 | -0.13 | 0.05  | -0.08 |
| Slc39a14 | Solute carrier family 39 (zinc transporter), member 14                                         | -0.42 | -0.37 | -0.02 | -0.80 | -0.83 | 0.41  | 0.05  | -0.38 | 0.19  | 0.36  |
| Slc3a2   | solute carrier family 3 (activators of dibasic and neutral amino acid transport), member 2     | 0.18  | -0.97 | -1.38 | -1.37 | -1.42 | -0.03 | -0.32 | 0.23  | 0.85  | 0.62  |
| Slc45a2  | solute carrier family 45, member 2                                                             | 0.02  | -1.15 | -0.88 | -1.33 | -0.78 | -0.03 | 0.18  | 0.48  | 0.35  | 0.72  |
| Slc6a17  | solute carrier family 6 (neurotransmitter transporter), member 17                              | -0.10 | 0.09  | 0.01  | 0.01  | 0.11  | -0.03 | 0.06  | 0.21  | 0.36  | 0.63  |
| Slc7a5   | solute carrier family 7 (cationic amino acid transporter, y <sup>+</sup> system), member 5     | 0.06  | -0.51 | -1.16 | -1.23 | -1.11 | -0.06 | -0.28 | -0.09 | 0.41  | 0.11  |
| Tagln2   | transgelin 2                                                                                   | -0.10 | -0.64 | 0.00  | -0.43 | -0.19 | 0.14  | -0.08 | -0.08 | 0.28  | 0.27  |
| Tars     | threonyl-tRNA synthetase                                                                       | -0.24 | -0.39 | -0.80 | -0.82 | -0.85 | 0.02  | 0.02  | -0.10 | 0.00  | 0.05  |
| Tfrc     | transferrin receptor                                                                           | -0.18 | -0.57 | -0.69 | -0.74 | -0.67 | 0.04  | 0.01  | -0.19 | 0.13  | -0.14 |
| Tmem33   | transmembrane protein 33, transcript variant 2                                                 | -0.67 | -0.02 | 0.16  | -0.89 | -0.05 | 0.29  | 0.07  | 0.42  | 0.05  | -0.24 |
| Tnfaip3  | tumor necrosis factor, alpha-induced protein 3                                                 | 0.20  | -0.60 | -0.49 | -0.62 | -0.29 | -0.41 | -0.12 | -0.02 |       | -0.55 |
| Tpi1     | triosephosphate isomerase 1                                                                    | 0.15  | -0.40 | -0.67 | -0.62 | -0.44 | 0.03  | 0.04  | -0.03 | 0.28  | 0.01  |
| Trpv2    | transient receptor potential cation channel, subfamily V, member 2                             | -0.07 | -0.50 | -0.47 | -0.61 | -0.40 | 0.08  | 0.04  | 0.20  | 0.24  | 0.44  |
| Tspan10  | tetraspanin 10                                                                                 | -0.23 | -0.20 | -0.21 | -0.66 | -0.65 | -0.13 | 0.27  | 0.15  | 0.02  | 0.60  |
| Tuba4    | tubulin, alpha 4                                                                               | -0.04 | -0.34 | -0.65 | -0.59 | -0.35 | 0.21  | 0.10  | 0.14  | 0.52  | 0.58  |
| Tyr      | tyrosinase                                                                                     | -0.32 | -0.56 | -0.68 | -0.82 | -1.18 | -0.07 | 0.37  | 0.56  | 0.29  | 0.63  |
| Tyrp1    | tyrosinase-related protein 1                                                                   | -0.25 | -0.81 | -0.46 | -0.82 | -0.65 | -0.03 | 0.18  | 0.27  | 0.19  | 0.43  |
| Yars     | tyrosyl-tRNA synthetase                                                                        | 0.07  | -0.16 | -0.50 | -0.59 | -0.29 | -0.01 | -0.23 | 0.05  | 0.13  | 0.06  |
| Abhd2    | abhydrolase domain containing 2                                                                | -0.08 | 0.18  | 1.00  | 1.01  | 0.46  | -0.09 |       |       | -0.11 |       |
| Anxa11   | annexin A11                                                                                    | 0.00  | 0.26  | 0.80  | 0.61  | 0.60  | 0.04  | -0.13 | -0.19 | 0.03  | -0.06 |
| Arl6ip5  | ADP-ribosylation factor-like 6 interacting protein 5                                           | -0.24 | 0.09  | 0.47  | 0.60  | 0.48  | 0.03  | 0.00  | 0.25  | 0.09  | -0.14 |
| Atg9a    | autophagy-related 9A (yeast)                                                                   | 0.13  | 0.12  | 0.12  | 0.59  | 0.62  | -0.11 | 0.06  | 0.01  | -0.14 | 0.08  |
| Atp1b2   | ATPase, Na <sup>+</sup> /K <sup>+</sup> transporting, beta 2 polypeptide                       | 0.05  | 0.34  | 0.89  | 1.78  | 0.86  | 0.16  | -0.35 | 0.11  | -0.56 | 0.08  |
| Atp1b2   | ATPase, Na <sup>+</sup> /K <sup>+</sup> transporting, beta 2 polypeptide                       | 0.05  | 0.34  | 0.89  | 1.78  | 0.86  | 0.08  | -0.56 | 0.11  | -0.35 | 0.16  |
| Cald1    | Caldesmon 1                                                                                    | 0.06  | 1.20  | 1.32  | 1.60  | 1.85  | -0.12 | 0.05  | -0.44 | -0.68 | -0.84 |
| Cap1     | CAP, adenylate cyclase-associated protein 1 (yeast)                                            | -0.29 | 0.89  | 0.29  | 0.78  | 0.62  | -0.06 | -0.86 | 0.03  | -0.58 | -0.56 |
| Capg     | capping protein (actin filament), gelsolin-like                                                | 0.08  | -0.08 | 0.29  | 0.78  | 0.87  | -0.07 | -0.13 | -0.01 | 0.33  | 0.27  |
| Cd81     | CD 81 antigen                                                                                  | 0.25  | 0.54  | 0.29  | 0.62  | 0.64  | -0.05 | 0.02  | -0.03 | -0.14 | 0.07  |
| Cd82     | CD82 antigen                                                                                   | 0.08  | -0.25 | 0.65  | 0.70  | 0.47  |       | -0.11 | 0.31  | 0.10  | 0.28  |
| Cnp1     | cyclic nucleotide phosphodiesterase 1                                                          | 0.03  | 0.53  | 0.86  | 1.26  | 0.93  | -0.07 | 0.15  |       | -0.09 | 0.02  |
| Cst3     | cystatin C (Cst3)                                                                              | 0.12  | 0.63  | 0.93  | 1.58  | 1.44  | 0.01  | -0.17 | -0.19 | -0.35 | -0.15 |
| Dbn1     | Drebrin 1                                                                                      | -0.30 | 0.07  | -0.06 | 0.70  | 0.70  | -0.11 | -0.10 | 0.03  | 0.21  | -0.08 |
| Dhrs8    | dehydrogenase/reductase (SDR family) member 8                                                  | -0.16 | 0.22  | 0.32  | 1.12  | 0.54  | -0.17 | -0.09 |       | -0.20 | 0.45  |
| Enah     | enabled homolog (Drosophila)                                                                   | 0.18  | 0.10  | 0.83  | 0.62  | 0.25  |       | -0.07 | -0.01 | -0.21 | -0.01 |
| Gla      | galactosidase, alpha                                                                           | -0.09 | -0.55 |       |       |       | -0.06 | 0.03  | 0.16  | 0.72  | -0.18 |
| Gnal     | guanine nucleotide binding protein, alpha stimulating, olfactory type, transcript variant 1    | 0.47  | -0.47 | 0.01  |       |       | 0.03  | 0.33  | 0.36  | 0.65  | 0.69  |
| Gnb4     | guanine nucleotide binding protein, beta 4                                                     | -0.07 | 0.43  | 0.14  | 0.60  | 0.35  | -0.07 | -0.10 | -0.26 | -0.23 | -0.29 |
| Gsn      | gelsolin                                                                                       | 0.01  | 0.42  | 0.15  | 0.60  | 0.32  | -0.02 | 0.08  | 0.14  | -0.34 | 0.06  |
| Igf2r    | insulin-like growth factor 2 receptor                                                          | -0.01 | 0.68  | 0.58  | 0.64  | 0.46  | 0.08  | 0.22  | -0.37 | -0.12 | 0.30  |
| Leprot   | leptin receptor overlapping transcript                                                         | 0.19  | 0.27  | -0.07 | 0.62  | 0.55  | -0.03 | -0.01 | 0.14  | -0.14 | 0.03  |
| Lrp1     | low density lipoprotein receptor-related protein 1                                             | -0.31 | 0.71  | 0.63  | 1.01  | 0.66  | -0.09 | -0.21 | 0.26  | 0.19  | -0.47 |
| Lrpap1   | low density lipoprotein receptor-related protein associated protein 1                          | 0.24  | 0.05  | 0.29  | 0.71  | 0.63  | 0.04  | 0.00  | -0.03 | 0.28  | 0.18  |
| Macf1    | PREDICTED: microtubule-actin crosslinking factor 1, transcript variant 12                      | -0.91 | 0.69  | 0.19  | 0.13  | 0.11  | -0.03 | -0.19 | 0.00  | 0.24  | -0.38 |
| Man2b1   | mannosidase 2, alpha B1                                                                        | 0.11  | 0.08  | -0.05 | 0.20  | 0.04  | -0.06 | -0.03 | 0.19  | 0.40  | 0.59  |



| Gene     | Description                                                                                                                 | ASP   |      |      |      | MSH   |       |       |       |       |       |
|----------|-----------------------------------------------------------------------------------------------------------------------------|-------|------|------|------|-------|-------|-------|-------|-------|-------|
|          |                                                                                                                             | 3 h   | 1d   | 2d   | 3d   | 4d    | 3 h   | 1d    | 2d    | 3d    | 4d    |
| Mbc2     | membrane bound C2 domain containing protein                                                                                 | 0.15  | 0.16 | 0.49 | 0.32 | -0.07 | 0.02  | 0.02  | 0.06  | 0.43  | 0.73  |
| Myh14    | myosin, heavy polypeptide 14                                                                                                | 0.03  | 0.39 | 0.64 | 1.11 | 0.60  | -0.17 | 0.06  | 0.38  |       |       |
| Ncstn    | nicastrin                                                                                                                   | -0.79 | 0.28 | 0.24 | 0.72 | 0.40  | -0.09 | -0.16 | 0.09  | 0.25  | -0.18 |
| Ppfibp1  | PTPRF interacting protein, binding protein 1 (liprin beta 1)                                                                | -0.26 | 0.22 | 0.26 | 0.60 | 0.32  | -0.01 | -0.05 | -0.15 | -0.09 | -0.19 |
| Prkar1a  | Protein kinase, cAMP dependent regulatory, type I, alpha                                                                    | -0.45 | 0.41 | 0.26 | 0.80 | 0.87  | 0.08  | 0.13  | 0.06  | 0.30  | -0.15 |
| Rab33b   | RAB33B, member of RAS oncogene family                                                                                       | 0.13  | 0.13 | 0.48 | 0.63 | 1.03  | 0.02  | 0.22  | -0.02 | -0.26 | -0.35 |
| S100a11  | S100 calcium binding protein A11 (calizzarin)                                                                               | 0.04  | 0.33 | 0.84 | 1.10 | 1.02  | 0.05  | -0.14 | -0.13 | -0.03 | -0.08 |
| Sema4c   | PREDICTED: sema domain, immunoglobulin domain (Ig), transmembrane domain (TM) and short cytoplasmic domain, (semaphorin) 4C | -0.13 | 0.26 | 0.44 | 0.59 | 0.31  | -0.11 | -0.30 | -0.20 | 0.05  | -0.05 |
| Serinc5  | serine incorporator 5                                                                                                       | -0.30 | 0.05 | 0.61 | 0.70 | 0.03  | -0.30 | -0.09 | 0.03  | -0.13 | -0.11 |
| Serpine2 | serine (or cysteine) peptidase inhibitor, clade E, member 2                                                                 | 0.15  | 0.50 | 0.95 | 1.21 | 0.47  | 0.05  | -0.09 | -0.10 | -0.29 | -0.36 |
| Slc29a1  | Solute carrier family 29 (nucleoside transporters), member 1                                                                | -0.10 | 0.22 | 0.34 | 0.72 | 0.80  | 0.05  | -0.32 | -0.02 | -0.12 | -0.14 |
| Slc29a1  | solute carrier family 29 (nucleoside transporters), member 1                                                                | -0.20 | 0.36 | 0.38 | 1.12 | 0.77  | 0.05  | -0.10 | 0.14  | -0.26 | -0.27 |
| Snx4     | Sorting nexin 4                                                                                                             | 0.02  | 0.48 | 0.40 | 0.61 | 0.36  | -0.05 | -0.20 | -0.21 | -0.21 | -0.31 |
| Tln1     | talin 1                                                                                                                     | -0.90 | 0.63 | 0.28 | 0.40 | 0.28  | -0.08 | -0.08 | 0.22  | 0.14  | -0.68 |
| Tmem106b | Transmembrane protein 106B                                                                                                  | 0.19  | 0.24 | 0.35 | 0.72 | 0.31  | 0.03  | 0.09  | 0.09  | 0.01  | 0.07  |
| Tpm4     | tropomyosin 4                                                                                                               | 0.08  | 0.05 | 0.03 | 0.39 | 0.60  | 0.12  | 0.08  | 0.03  | -0.04 | -0.12 |
| Tspan14  | tetraspanin 14                                                                                                              | 0.09  | 0.35 | 0.41 | 0.61 | 0.41  | 0.02  | -0.08 | -0.11 | -0.18 | -0.02 |
| Tspan3   | tetraspanin 3                                                                                                               | 0.06  | 0.25 | 0.32 | 0.98 | 0.78  | 0.05  | -0.08 | -0.21 | -0.26 | -0.12 |
| Vcl      | vinculin                                                                                                                    | 0.02  | 0.08 | 0.74 | 0.75 | 0.48  | -0.07 | -0.04 | 0.13  | 0.19  | 0.22  |
| Vim      | vimentin                                                                                                                    | 0.04  | 0.24 | 0.54 | 0.73 | 0.48  | -0.10 | 0.22  | -0.16 | -0.26 | -0.01 |
| Vkorc1   | vitamin K epoxide reductase complex, subunit 1                                                                              | 0.26  | 0.36 | 0.36 | 0.60 | 0.48  | 0.04  | -0.08 | 0.09  | -0.03 | 0.15  |

**Table S3. ASP-altered genes coding for Wnt-signaling related proteins**

| Gene     | Description                                                                                   | Log ASP/control |
|----------|-----------------------------------------------------------------------------------------------|-----------------|
| Tcf4     | transcription factor 4                                                                        | 1.23            |
| Ccnd1    | cyclin D1                                                                                     | 1.14            |
| Lef1     | lymphoid enhancer binding factor 1                                                            | 1.13            |
| Ppap2b   | phosphatidic acid phosphatase type 2B                                                         | 1.06            |
| Plcb1    | Phospholipase C, beta 1                                                                       | 1.04            |
| Fzd7     | frizzled homolog 7 (Drosophila)                                                               | 0.95            |
| Wnt6     | wingless-related MMTV integration site 6                                                      | 0.93            |
| Lrp1     | low density lipoprotein receptor-related protein 1                                            | 0.91            |
| Tcf3     | transcription factor 3                                                                        | 0.89            |
| Tcf7l2   | Transcription factor 7-like 2, T-cell specific, HMG-box                                       | 0.80            |
| Fzd3     | Frizzled homolog 3 (Drosophila)                                                               | 0.79            |
| Nfatc1   | nuclear factor of activated T-cells, cytoplasmic, calcineurin-dependent, transcript variant 1 | 0.78            |
| Ctnnbip1 | catenin beta interacting protein 1                                                            | 0.76            |
| Bcl9     | B-cell CLL/lymphoma 9                                                                         | 0.74            |
| Plcb4    | phospholipase C, beta 4                                                                       | 0.73            |
| Lrp5     | low density lipoprotein receptor-related protein 5                                            | 0.73            |
| Tle6     | transducin-like enhancer of split 6, homolog of Drosophila E(spl)                             | 0.69            |
| Hbp1     | High mobility group box transcription factor 1                                                | 0.68            |
| Mapk8    | Mitogen activated protein kinase 8                                                            | 0.65            |
| Fzd2     | frizzled homolog 2 (Drosophila)                                                               | 0.64            |
| Tbl1xr1  | PREDICTED: transducin (beta)-like 1X-linked receptor 1, transcript variant 2                  | 0.61            |
| Prickle1 | prickle like 1 (Drosophila)                                                                   | 0.61            |
| Prkacb   | protein kinase, cAMP dependent, catalytic, beta                                               | 0.61            |
| Daam2    | dishevelled associated activator of morphogenesis 2                                           | 0.61            |
| Dkk3     | dickkopf homolog 3 (Xenopus laevis)                                                           | 0.61            |
| Cacybp   | calyculin binding protein                                                                     | -0.64           |

**Table S4. Genes up-regulated by ASP, involved in development, cell-adhesion and/or extracellular-matrix (ECM) remodeling, analyzed from the microarray data**

| NSD including cell differentiation, neurogenesis, cell migration | Embryonic, vasculature, skeletal and muscle development | Others anatomical structure development | Cell-adhesion molecules | ECM     | Metallo-endopeptidases | Cytoskeleton | Signaling molecules involved in migration |
|------------------------------------------------------------------|---------------------------------------------------------|-----------------------------------------|-------------------------|---------|------------------------|--------------|-------------------------------------------|
| Ablim1                                                           | Adamts4                                                 | Crip2                                   | Alcam                   | Agrn    | Adam11                 | Ablim1       | Arhgap6                                   |
| Agt                                                              | Agt                                                     | Egr1                                    | Amigo1                  | Bcan    | Adam12                 | Acta2        | Arhgef19                                  |
| Alcam                                                            | Aldh1a1                                                 | Id3                                     | Cdh2                    | Col10a1 | Adam19                 | Actg2        | Arhgef9                                   |
| Aldh1a3                                                          | Aldh1a3                                                 | Itga6                                   | Cdh13                   | Col11a1 | Adam23                 | Actn4        | Cdc42ep1                                  |
| Amigo1                                                           | Aplp2                                                   | Kirrel3                                 | Itga1                   | Col14a1 | Adamts1                | Actn4        | Cdc42ep3                                  |
| Cnp1                                                             | Col11a1                                                 | Lefty2                                  | Itga3                   | Col1a1  | Adamts4                | Ctnnal1      | Cdc42 se1                                 |
| Dlx5                                                             | Col4a2                                                  | Mitf                                    | Itga6                   | Col3a1  | Adamts5                | Ctnnbip1     | Farp1                                     |
| Efnb2                                                            | Col8a1                                                  | Npnt                                    | Itga8                   | Col4a1  | Adamts9                | Ctnnd2       | Mapk8                                     |
| ErbB3                                                            | Ctgf                                                    | Nr4a3                                   | Itgav                   | Col4a2  | Adamtsl4               | Myh14        | Ptk2b                                     |
| Foxd1                                                            | Cyp26b1                                                 | Peg10                                   | Itgb3                   | Col5a1  | Mme                    | Mylk         | Rhob                                      |
| Gbx2                                                             | Dlx5                                                    | Postn                                   | Itgb5                   | Col5a3  | Mmp15                  | Myo10        | Rhobtb1                                   |
| Itga3                                                            | Efnb2                                                   | Spry1                                   | Jam2                    | Col8a1  | Mmp17                  | Phactr1      | Rhobtb3                                   |
| Lamb1-1                                                          | Fgf1                                                    | Tns3                                    | Mcam                    | Col9a1  | Mmp2                   | Smarca2      | Rhoj                                      |
| Lef1                                                             | Gbx2                                                    |                                         | Pcdh1                   | Col9a2  | Timp2                  | Smarcd1      | Rock2                                     |
| Mbp                                                              | Hoxa3                                                   |                                         | Pcdh11x                 | Ctgf    |                        | Smarcd3      | Sh2d3c                                    |
| Mef2c                                                            | Id1                                                     |                                         | Pcdh7                   | Dag1    |                        | Tpm1         | Sh3 glb1                                  |
| Ndrg2                                                            | Lect1                                                   |                                         | Pcdha5                  | Dmd     |                        | Tpm4         | Shc1                                      |
| Nrxn1                                                            | Lef1                                                    |                                         | Pcdhb14                 | Dmp1    |                        | Waspip       | Shc2                                      |
| Rapgef5                                                          | Mef2c                                                   |                                         | Pcdhb15                 | Dtna    |                        |              |                                           |
| Rtn4r11                                                          | Mest                                                    |                                         | Pcdhb16                 | Ecm1    |                        |              |                                           |
| Sema3d                                                           | Pdgfa                                                   |                                         | Pcdhb17                 | Efemp2  |                        |              |                                           |
| Sema3f                                                           | Pdgfb                                                   |                                         | Pcdhb19                 | Emilin1 |                        |              |                                           |
| Sema6a                                                           | Ppap2b                                                  |                                         | Pcdhb21                 | Fgf1    |                        |              |                                           |
| Serpine2                                                         | Prelp                                                   |                                         | Pcdhb22                 | Hspg2   |                        |              |                                           |
| Tcfap2a                                                          | Sox4                                                    |                                         | Pcdhgb4                 | Lama4   |                        |              |                                           |
| Uchl1                                                            | Sox6                                                    |                                         | Pcdhgc5                 | Lama5   |                        |              |                                           |
|                                                                  | Vdr                                                     |                                         | Sdc2                    | Lamb1-1 |                        |              |                                           |
|                                                                  | Actg2                                                   |                                         | Sdc3                    | Lamb2   |                        |              |                                           |
|                                                                  | Dmd                                                     |                                         | Sdc4                    | Ltbp1   |                        |              |                                           |
|                                                                  | Igfbp3                                                  |                                         | Thbs1                   | Ltbp3   |                        |              |                                           |
|                                                                  |                                                         |                                         |                         | Matn2   |                        |              |                                           |
|                                                                  |                                                         |                                         |                         | Nid2    |                        |              |                                           |
|                                                                  |                                                         |                                         |                         | Npnt    |                        |              |                                           |
|                                                                  |                                                         |                                         |                         | Postn   |                        |              |                                           |
|                                                                  |                                                         |                                         |                         | Prelp   |                        |              |                                           |
|                                                                  |                                                         |                                         |                         | Tgfbr3  |                        |              |                                           |
|                                                                  |                                                         |                                         |                         | Tgm2    |                        |              |                                           |
|                                                                  |                                                         |                                         |                         | Wnt6    |                        |              |                                           |

All genes represented were increased by ASP by at least 1.5-fold ( $P < 0.01$ ). The first 3 columns show genes up-regulated by 2-fold or more ( $P < 0.01$ ).
